# Supplementary material for: Nickel oxide nanoparticles induce developmental neurotoxicity in zebrafish by triggering both apoptosis and ferroptosis
Source: Royal Society of Chemistry journal article supplement (doi:10.1039/d2en00757f), 2023-01-01
Supplement: d2en00757f1.pdf [file d2en00757f1.pdf]

**Electronic Supplementary Information (ESI) for**

**Environmental Science: Nano**

**Nickel oxide nanoparticles induce developmental neurotoxicity  
in zebrafish by triggering apoptosis and ferroptosis.**

Zuo Wang<sup>1,#</sup>, Yi Bi<sup>1,2,#</sup>, Kemin Li<sup>1</sup>, Zan Song<sup>1</sup>, Chuanying Pan<sup>2</sup>, Shengxiang Zhang<sup>1</sup>,  
Xianyong Lan<sup>2,\*</sup>, Nicholas S. Foulkes<sup>3,\*</sup>, Haiyu Zhao<sup>1,\*</sup>

<sup>1</sup> School of Life Sciences, Gansu Key Laboratory of Biomonitoring and Bioremediation  
for Environmental Pollution, Lanzhou University, No. 222 South Tianshui Road,  
Lanzhou 730000, Gansu Province, China.

<sup>2</sup> Key Laboratory of Animal Genetics, Breeding and Reproduction of Shaanxi Province,  
College of Animal Science and Technology, Northwest A&F University, No. 22 Xinong  
Road, Yangling 712100, Shaanxi Province, China.

<sup>3</sup> Institute of Biological and Chemical Systems, Biological Information Processing  
(IBCS-BIP), Karlsruhe Institute of Technology (KIT), Hermann-von-Helmholtz Platz 1,  
76344 Eggenstein-Leopoldshafen, Germany.

# These authors contributed equally to this work.

\* **Corresponding author:**

Dr. Haiyu Zhao      Email: [zhaohy@lzu.edu.cn](mailto:zhaohy@lzu.edu.cn) (Lead contact)

Prof. Dr. Xianyong Lan      Email: [lanxianyong79@nwsuaf.edu.cn](mailto:lanxianyong79@nwsuaf.edu.cn)

Prof. Dr. Nicholas S. Foulkes      Email: [nicholas.foulkes@kit.edu](mailto:nicholas.foulkes@kit.edu)

Table S1. Sequences of primers used in this study.

Table S2. Detailed statistical information in this study.

Figure S1. Survival rate of zebrafish embryos/larvae exposed to NiO-NPs from 1 to 12 dpf.

Figure S2. The median lethal concentration (LC50) of NiO-NPs to zebrafish larvae.

Number of Pages: 26

Number of Tables: 2

Number of Figures: 2

Table S1. Sequences of primers used in this study.

|                          | gene name        | Sequences of the primers (5' – 3')                         |
|--------------------------|------------------|------------------------------------------------------------|
| Neurodevelopment-related | <i>elavl3</i>    | F: AGACAAGATCACAGGCCAGAGCTT<br>R: TGGTCTGCAGTTTGAGACCGTTGA |
|                          | <i>gap43</i>     | F: GCAGCAGGAAGTGGAGAAGCCA<br>R: GGATTCCTCAGCAGCGTCTGGT     |
|                          | <i>syn2a</i>     | F: GTGACCATGCCAGCATTTC<br>R: TGGTTCTCCACTTTTCACCTT         |
|                          | <i>mbpa</i>      | F: AATCAGCAGGTTCTTCGGAGGAGA<br>R: AAGAAATGCACGACAGGGTTGACG |
|                          | <i>bax</i>       | F: GGCTATTTCAACCAGGGTTCC<br>R: TGCGAATCACCAATGCTGT         |
|                          | <i>bcl2</i>      | F: AACCCAAATTCTGCGCAACG<br>R: ATCTACCTGGGACGCCATCT         |
| Apoptosis-related        | <i>caspase3b</i> | F: ATCTACGGCACGGACAACAG<br>R: AACCCAGGAGCCATTAGCGAC        |
|                          | <i>caspase8</i>  | F: TGTCTCAGCCTATAGAAAGATGC<br>R: AAATGAAGTAGATCTTCCCAGCT   |
|                          | <i>caspase9</i>  | F: TCTGCCAGTCCAAAATCTAAATC<br>R: GCATCCATCTTGTAGCACTGTAT   |
| Ferroptosis-related      | <i>ptgs2a</i>    | F: TGAGGAGATGACAGGAGACA<br>R: CACAAGAAGGCCAGGATACA         |
|                          | <i>ptgs2b</i>    | F: GCTGACATCACGTGCCCATC<br>R: TACCTGCGACTCCCATTGGC         |
|                          | <i>nrf2</i>      | F: GACAAAATCGGCGACAAAAT<br>R: TTAGGCCATGTCCACACGTA         |
|                          | <i>dmt1</i>      | F: CTGCGCTCTACATCTGGGCT<br>R: CTGCACGTCCTGAAACACGG         |
|                          | <i>tf</i>        | F: AAGGAAAGGACTGGGCAAAGGA                                  |

---

|                |                              |
|----------------|------------------------------|
|                | R: TCACAGCATGAACTGGCACTTG    |
| <i>tfr</i>     | F: ATGGATCAAGCCAGGACAACC     |
|                | R: CTAAGAGGTGAGCTGAAG        |
| <i>ftb</i>     | F: CAGGACGTGAAGAAACCAGAGAAGG |
|                | R: ATGTGAGGGTCGTTGTGTTGAGATG |
| <i>gap4a</i>   | F: TGCGACACCACAACACTGACTGAAC |
|                | R: ACCAATGATCCCCTGCTCGATAAAG |
| <i>slc7all</i> | F: CGCCATTGCCATTATCATT       |
|                | R: TTCTCCACCTCCTCAGTC        |
| <i>ho-1</i>    | F: ATGCCCTTGTTTCCAGTCAGC     |
|                | R: GGACTIONGAGCACTTCTTCGG    |

---

Table S2. Detailed statistical information in this study.

| Figure                          | Test method                 | Significance                   | N                   |
|---------------------------------|-----------------------------|--------------------------------|---------------------|
| <b>Figure. 2B</b> Survival rate |                             |                                |                     |
| 6 dpf                           | Ctrl                        | One-way ANOVA                  | F=2.919; P=0.04 *   |
|                                 | 5 mg/L vs. Ctrl             | Dunnett's multiple comparisons | P=0.10      ns      |
|                                 | 10 mg/L vs. Ctrl            |                                | P=0.29      ns      |
|                                 | 20 mg/L vs. Ctrl            |                                | P=0.50      ns      |
|                                 | 50 mg/L vs. Ctrl            |                                | P=0.02      *       |
|                                 | 100 mg/L vs. Ctrl           |                                | P=0.02      *       |
| □                               |                             |                                |                     |
| <b>Figure. 2C</b> Hatching rate |                             |                                |                     |
| 60 hpf                          | Ctrl                        | One-way ANOVA                  | F=0.8533; P=0.53 ns |
|                                 | 5 mg/L vs. Ctrl             | Dunnett's multiple comparisons | P=0.7236      ns    |
|                                 | 10 mg/L vs. Ctrl            |                                | P=0.6070      ns    |
|                                 | 20 mg/L vs. Ctrl            |                                | P=0.0693      ns    |
|                                 | 50 mg/L vs. Ctrl            |                                | P=0.0387      *     |
|                                 | 100 mg/L vs. Ctrl           |                                | P=0.0270      *     |
| □                               |                             |                                |                     |
| <b>Figure. 2D</b> Body length   |                             |                                |                     |
| Ctrl                            | Kruskal-Wallis              | H=11.99; P=0.03 *              | N=19                |
| 5 mg/L vs. Ctrl                 | Dunn's multiple comparisons | P=0.13      ns                 | N=18                |
| 10 mg/L vs. Ctrl                |                             | P=0.01      *                  | N=22                |
| 20 mg/L vs. Ctrl                |                             | P=0.04      *                  | N=23                |
| 50 mg/L vs. Ctrl                |                             | P=0.01      *                  | N=28                |
| 100 mg/L vs. Ctrl               |                             | P=0.01      *                  | N=20                |
| □                               |                             |                                |                     |
| <b>Figure. 2E</b> Heart rate    |                             |                                |                     |

|                   |                                |                      |     |      |
|-------------------|--------------------------------|----------------------|-----|------|
| Ctrl              | One-way ANOVA                  | F=34.62; P<0.001 *** |     | N=11 |
| 5 mg/L vs. Ctrl   | Dunnett's multiple comparisons | P=0.05               | *   | N=11 |
| 10 mg/L vs. Ctrl  |                                | P<0.001              | *** | N=11 |
| 20 mg/L vs. Ctrl  |                                | P<0.001              | *** | N=11 |
| 50 mg/L vs. Ctrl  |                                | P<0.001              | *** | N=11 |
| 100 mg/L vs. Ctrl |                                | P<0.001              | *** | N=11 |

□

**Figure. 2F** spontaneous movement (26 hpf)

|                   |                             |                    |    |      |
|-------------------|-----------------------------|--------------------|----|------|
| Ctrl              | Kruskal-Wallis              | H=2.824; P=0.73 ns |    | N=19 |
| 5 mg/L vs. Ctrl   | Dunn's multiple comparisons | P>0.99             | ns | N=17 |
| 10 mg/L vs. Ctrl  |                             | P=0.92             | ns | N=19 |
| 20 mg/L vs. Ctrl  |                             | P>0.99             | ns | N=16 |
| 50 mg/L vs. Ctrl  |                             | P=0.01             | *  | N=18 |
| 100 mg/L vs. Ctrl |                             | P=0.02             | *  | N=18 |

□

**Figure. 3C** Distance moved by larvae under locomotion test

|                   |                                |                      |     |      |
|-------------------|--------------------------------|----------------------|-----|------|
| Ctrl              | One-way ANOVA                  | F=6.042; P<0.001 *** |     | N=16 |
| 5 mg/L vs. Ctrl   | Dunnett's multiple comparisons | P=0.06               | ns  | N=16 |
| 10 mg/L vs. Ctrl  |                                | P=0.02               | *   | N=16 |
| 20 mg/L vs. Ctrl  |                                | P=0.02               | *   | N=16 |
| 50 mg/L vs. Ctrl  |                                | P=0.02               | *   | N=16 |
| 100 mg/L vs. Ctrl |                                | P<0.001              | *** | N=16 |

□

**Figure. 3D** Velocity of larvae under locomotion test

|                  |                                |                      |    |      |
|------------------|--------------------------------|----------------------|----|------|
| Ctrl             | One-way ANOVA                  | F=6.042; P<0.001 *** |    | N=16 |
| 5 mg/L vs. Ctrl  | Dunnett's multiple comparisons | P=0.06               | ns | N=16 |
| 10 mg/L vs. Ctrl |                                | P=0.02               | *  | N=16 |
| 20 mg/L vs. Ctrl |                                | P=0.02               | *  | N=16 |
| 50 mg/L vs. Ctrl |                                | P=0.02               | *  | N=16 |

|                                                                                  |                             |                      |     |      |
|----------------------------------------------------------------------------------|-----------------------------|----------------------|-----|------|
| 100 mg/L vs. Ctrl                                                                |                             | P<0.001              | *** | N=16 |
| □                                                                                |                             |                      |     |      |
| <b>Figure. 3E</b> Cumulative mobility of larvae under locomotion test            |                             |                      |     |      |
| Ctrl                                                                             | Kruskal-Wallis              | H=25.99; P<0.001 *** |     | N=16 |
| 5 mg/L vs. Ctrl                                                                  | Dunn's multiple comparisons | P=0.06               | ns  | N=16 |
| 10 mg/L vs. Ctrl                                                                 |                             | P=0.02               | *   | N=16 |
| 20 mg/L vs. Ctrl                                                                 |                             | P=0.04               | *   | N=16 |
| 50 mg/L vs. Ctrl                                                                 |                             | P=0.03               | *   | N=16 |
| 100 mg/L vs. Ctrl                                                                |                             | P<0.001              | *** | N=16 |
| □                                                                                |                             |                      |     |      |
| <b>Figure. 3F</b> Maximum acceleration of larvae under locomotion test           |                             |                      |     |      |
| Ctrl                                                                             | One-way ANOVA               | F=1.606; P=0.17 ns   |     | N=16 |
| 5 mg/L vs. Ctrl                                                                  | Dunn's multiple comparisons | P=0.5                | ns  | N=16 |
| 10 mg/L vs. Ctrl                                                                 |                             | P=0.42               | ns  | N=16 |
| 20 mg/L vs. Ctrl                                                                 |                             | P=0.42               | ns  | N=16 |
| 50 mg/L vs. Ctrl                                                                 |                             | P=0.42               | ns  | N=16 |
| 100 mg/L vs. Ctrl                                                                |                             | P=0.04               | *   | N=16 |
| □                                                                                |                             |                      |     |      |
| <b>Figure. 3I</b> Distance moved of larvae during whole tapping stimulation test |                             |                      |     |      |
| Ctrl                                                                             | One-way ANOVA               | F=3.659; P=0.005 **  |     | N=16 |
| 5 mg/L vs. Ctrl                                                                  | Dunn's multiple comparisons | P=0.02               | *   | N=16 |
| 10 mg/L vs. Ctrl                                                                 |                             | P=0.01               | **  | N=16 |
| 20 mg/L vs. Ctrl                                                                 |                             | P=0.03               | *   | N=16 |
| 50 mg/L vs. Ctrl                                                                 |                             | P=0.04               | *   | N=16 |
| 100 mg/L vs. Ctrl                                                                |                             | P<0.001              | *** | N=16 |
| □                                                                                |                             |                      |     |      |
| <b>Figure. 3J</b> Velocity of larvae during whole tapping stimulation test       |                             |                      |     |      |
| Ctrl                                                                             | One-way ANOVA               | F=3.659; P=0.005 **  |     | N=16 |
| 5 mg/L vs. Ctrl                                                                  | Dunn's multiple comparisons | P=0.02               | *   | N=16 |

|                   |             |         |     |      |
|-------------------|-------------|---------|-----|------|
| 10 mg/L vs. Ctrl  | comparisons | P=0.01  | **  | N=16 |
| 20 mg/L vs. Ctrl  |             | P=0.03  | *   | N=16 |
| 50 mg/L vs. Ctrl  |             | P=0.04  | *   | N=16 |
| 100 mg/L vs. Ctrl |             | P<0.001 | *** | N=16 |

□

**Figure. 3K** Cumulative mobility of larvae during whole tapping stimulation test

|                   |                             |                     |     |      |
|-------------------|-----------------------------|---------------------|-----|------|
| Ctrl              | Kruskal-Wallis              | H=16.59; P=0.005 ** |     | N=16 |
| 5 mg/L vs. Ctrl   | Dunn's multiple comparisons | P=0.03              | *   | N=16 |
| 10 mg/L vs. Ctrl  |                             | P=0.02              | **  | N=16 |
| 20 mg/L vs. Ctrl  |                             | P=0.04              | *   | N=16 |
| 50 mg/L vs. Ctrl  |                             | P=0.20              | ns  | N=16 |
| 100 mg/L vs. Ctrl |                             | P<0.001             | *** | N=16 |

□

**Figure. 3L** Maximum acceleration of larvae during whole tapping stimulation test

|                   |                                |                      |     |      |
|-------------------|--------------------------------|----------------------|-----|------|
| Ctrl              | One-way ANOVA                  | F=74.33; P<0.001 *** |     | N=16 |
| 5 mg/L vs. Ctrl   | Dunnett's multiple comparisons | P>0.99               | ns  | N=16 |
| 10 mg/L vs. Ctrl  |                                | P<0.001              | *** | N=16 |
| 20 mg/L vs. Ctrl  |                                | P<0.001              | *** | N=16 |
| 50 mg/L vs. Ctrl  |                                | P<0.001              | *** | N=16 |
| 100 mg/L vs. Ctrl |                                | P<0.001              | *** | N=16 |

□

**Figure. 3M** Distance moved of larvae within 1s immediately after the vibrations

|                   |                                |                      |     |      |
|-------------------|--------------------------------|----------------------|-----|------|
| Ctrl              | One-way ANOVA                  | F=9.191; P<0.001 *** |     | N=16 |
| 5 mg/L vs. Ctrl   | Dunnett's multiple comparisons | P=0.97               | ns  | N=16 |
| 10 mg/L vs. Ctrl  |                                | P=0.75               | ns  | N=16 |
| 20 mg/L vs. Ctrl  |                                | P=0.02               | *   | N=16 |
| 50 mg/L vs. Ctrl  |                                | P=0.02               | *   | N=16 |
| 100 mg/L vs. Ctrl |                                | P<0.001              | *** | N=16 |

□



| <b>Figure. 3N</b> Velocity of larvae within 1s immediately after the vibrations             |                                |                      |     |      |
|---------------------------------------------------------------------------------------------|--------------------------------|----------------------|-----|------|
| Ctrl                                                                                        | One-way ANOVA                  | F=9.191; P<0.001 *** |     | N=16 |
| 5 mg/L vs. Ctrl                                                                             | Dunnett's multiple comparisons | P=0.97               | ns  | N=16 |
| 10 mg/L vs. Ctrl                                                                            |                                | P=0.75               | ns  | N=16 |
| 20 mg/L vs. Ctrl                                                                            |                                | P=0.02               | *   | N=16 |
| 50 mg/L vs. Ctrl                                                                            |                                | P=0.02               | *   | N=16 |
| 100 mg/L vs. Ctrl                                                                           |                                | P<0.001              | *** | N=16 |
| □                                                                                           |                                |                      |     |      |
| <b>Figure. 3O</b> Cumulative mobility of larvae within 1s immediately after the vibrations  |                                |                      |     |      |
| Ctrl                                                                                        | One-way ANOVA                  | F=9.191; P<0.001 *** |     | N=16 |
| 5 mg/L vs. Ctrl                                                                             | Dunnett's multiple comparisons | P=0.03               | *   | N=16 |
| 10 mg/L vs. Ctrl                                                                            |                                | P=0.07               | ns  | N=16 |
| 20 mg/L vs. Ctrl                                                                            |                                | P<0.001              | *** | N=16 |
| 50 mg/L vs. Ctrl                                                                            |                                | P=0.005              | *   | N=16 |
| 100 mg/L vs. Ctrl                                                                           |                                | P<0.001              | *** | N=16 |
| □                                                                                           |                                |                      |     |      |
| <b>Figure. 3P</b> Maximum acceleration of larvae within 1s immediately after the vibrations |                                |                      |     |      |
| Ctrl                                                                                        | One-way ANOVA                  | F=5.493; P<0.001 *** |     | N=16 |
| 5 mg/L vs. Ctrl                                                                             | Dunnett's multiple comparisons | P=0.69               | ns  | N=16 |
| 10 mg/L vs. Ctrl                                                                            |                                | P=0.21               | ns  | N=16 |
| 20 mg/L vs. Ctrl                                                                            |                                | P=0.02               | *   | N=16 |
| 50 mg/L vs. Ctrl                                                                            |                                | P=0.02               | *   | N=16 |
| 100 mg/L vs. Ctrl                                                                           |                                | P<0.001              | *** | N=16 |
| □                                                                                           |                                |                      |     |      |
| <b>Figure. 4C</b> Relative density of periventricular neurons (%)                           |                                |                      |     |      |
| Ctrl                                                                                        | One-way ANOVA                  | F=6.801; P<0.001 *** |     | N=6  |
| 5 mg/L vs. Ctrl                                                                             | Dunnett's multiple comparisons | P=0.02               | *   | N=6  |
| 10 mg/L vs. Ctrl                                                                            |                                | P<0.001              | *** | N=6  |
| 20 mg/L vs. Ctrl                                                                            |                                | P<0.001              | *** | N=6  |

|                   |  |         |     |     |
|-------------------|--|---------|-----|-----|
| 50 mg/L vs. Ctrl  |  | P<0.001 | *** | N=6 |
| 100 mg/L vs. Ctrl |  | P=0.009 | **  | N=6 |

□

**Figure. 4D-G** Relative expression levels of neurodevelopment-related genes

|               |                   |                                                     |                                |                                |                                |                   |     |     |
|---------------|-------------------|-----------------------------------------------------|--------------------------------|--------------------------------|--------------------------------|-------------------|-----|-----|
| <i>elav13</i> | Ctrl              | One-way ANOVA<br><br>Dunnett's multiple comparisons | F=92.96; P<0.001 ***           |                                | N=4                            |                   |     |     |
|               | 10 mg/L vs. Ctrl  |                                                     | P<0.001                        | ***                            |                                |                   |     |     |
|               | 100 mg/L vs. Ctrl |                                                     | P<0.001                        | ***                            |                                |                   |     |     |
| <i>gap43</i>  | Ctrl              |                                                     | Dunnett's multiple comparisons | F=33.16; P<0.001 ***           |                                | N=4               |     |     |
|               | 10 mg/L vs. Ctrl  |                                                     |                                | P<0.001                        | ***                            |                   |     |     |
|               | 100 mg/L vs. Ctrl |                                                     |                                | P=0.001                        | **                             |                   |     |     |
| <i>syn2a</i>  | Ctrl              |                                                     |                                | Dunnett's multiple comparisons | F=27.33; P<0.001 ***           |                   | N=4 |     |
|               | 10 mg/L vs. Ctrl  |                                                     |                                |                                | P<0.001                        | ***               |     |     |
|               | 100 mg/L vs. Ctrl |                                                     |                                |                                | P=0.01                         | *                 |     |     |
| <i>mbpa</i>   | Ctrl              |                                                     |                                |                                | Dunnett's multiple comparisons | F=7.530; P=0.01 * |     | N=4 |
|               | 10 mg/L vs. Ctrl  |                                                     |                                |                                |                                | P=0.02            | *   |     |
|               | 100 mg/L vs. Ctrl |                                                     |                                |                                |                                | P=0.02            | *   |     |

□

**Figure. 5B** Relative density of apoptotic cells

|                   |                                |                      |     |      |
|-------------------|--------------------------------|----------------------|-----|------|
| Ctrl              | One-way ANOVA                  | F=25.86; P<0.001 *** |     | N=10 |
| 10 mg/L vs. Ctrl  | Dunnett's multiple comparisons | P<0.001              | *** | N=8  |
| 100 mg/L vs. Ctrl |                                | P<0.001              | *** | N=8  |

□

**Figure. 5C** Relative expression levels of apoptosis-related genes

|            |                   |                                                     |                                |                      |     |     |
|------------|-------------------|-----------------------------------------------------|--------------------------------|----------------------|-----|-----|
| <i>bax</i> | Ctrl              | One-way ANOVA<br><br>Dunnett's multiple comparisons | F=141.1; P<0.001 ***           |                      | N=3 |     |
|            | 10 mg/L vs. Ctrl  |                                                     | P<0.001                        | ***                  |     |     |
|            | 100 mg/L vs. Ctrl |                                                     | P<0.001                        | ***                  |     |     |
| <i>bcl</i> | Ctrl              |                                                     | Dunnett's multiple comparisons | F=46.57; P<0.001 *** |     | N=3 |
|            | 10 mg/L vs. Ctrl  |                                                     |                                | P<0.001              | *** |     |
|            | 100 mg/L vs. Ctrl |                                                     |                                | P<0.001              | *** |     |

|                                                                                 |                                |                      |                      |     |     |
|---------------------------------------------------------------------------------|--------------------------------|----------------------|----------------------|-----|-----|
| <i>caspase3b</i>                                                                | Ctrl                           |                      | F=167.9; P<0.001 *** |     | N=3 |
|                                                                                 | 10 mg/L vs. Ctrl               |                      | P=0.009              | **  |     |
|                                                                                 | 100 mg/L vs. Ctrl              |                      | P<0.001              | *** |     |
| <i>caspase8</i>                                                                 | Ctrl                           |                      | F=10.70; P=0.01 *    |     | N=3 |
|                                                                                 | 10 mg/L vs. Ctrl               |                      | P=0.01               | *   |     |
|                                                                                 | 100 mg/L vs. Ctrl              |                      | P=0.02               | *   |     |
| <i>caspase9</i>                                                                 | Ctrl                           |                      | F=40.10; P<0.001 *** |     | N=3 |
|                                                                                 | 10 mg/L vs. Ctrl               |                      | P<0.001              | *** |     |
|                                                                                 | 100 mg/L vs. Ctrl              |                      | P=0.002              | **  |     |
| □                                                                               |                                |                      |                      |     |     |
| <b>Figure. 5D</b> Relative content of iron in zebrafish larvae (%)              |                                |                      |                      |     |     |
| Ctrl                                                                            | One-way ANOVA                  | F=78.17; P<0.001 *** |                      | N=3 |     |
| 10 mg/L vs. Ctrl                                                                | Dunnett's multiple comparisons | P=0.001              | **                   |     |     |
| 100 mg/L vs. Ctrl                                                               |                                | P<0.001              | ***                  |     |     |
| <b>Figure. 5D</b> Relative content of MDA in zebrafish larvae (%)               |                                |                      |                      |     |     |
| Ctrl                                                                            | One-way ANOVA                  | F=9.221; P=0.01 *    |                      | N=3 |     |
| 10 mg/L vs. Ctrl                                                                | Dunnett's multiple comparisons | P=0.01               | *                    |     |     |
| 100 mg/L vs. Ctrl                                                               |                                | P=0.05               | *                    |     |     |
| □                                                                               |                                |                      |                      |     |     |
| <b>Figure. 5E</b> Relative content of total glutathione in zebrafish larvae (%) |                                |                      |                      |     |     |
| Ctrl                                                                            | One-way ANOVA                  | F=6.784; P=0.03 *    |                      | N=3 |     |
| 10 mg/L vs. Ctrl                                                                | Dunnett's multiple comparisons | P=0.83               | ns                   |     |     |
| 100 mg/L vs. Ctrl                                                               |                                | P=0.03               | *                    |     |     |
| <b>Figure. 5E</b> Relative content of GSH in zebrafish larvae (%)               |                                |                      |                      |     |     |
| Ctrl                                                                            | One-way ANOVA                  | F=6.286; P=0.03 *    |                      | N=3 |     |
| 10 mg/L vs. Ctrl                                                                | Dunnett's multiple comparisons | P=0.84               | ns                   |     |     |
| 100 mg/L vs. Ctrl                                                               |                                | P=0.03               | *                    |     |     |
| <b>Figure. 5E</b> Relative ratio of GSH/GSSG in zebrafish larvae (%)            |                                |                      |                      |     |     |
| Ctrl                                                                            | One-way ANOVA                  | F=8.265; P=0.02 *    |                      | N=3 |     |

|                                                                           |                   |                                |                      |     |     |
|---------------------------------------------------------------------------|-------------------|--------------------------------|----------------------|-----|-----|
| 10 mg/L vs. Ctrl                                                          |                   | Dunnett's multiple comparisons | P=0.20               | ns  |     |
| 100 mg/L vs. Ctrl                                                         |                   |                                | P=0.01               | *   |     |
| □                                                                         |                   |                                |                      |     |     |
| <b>Figure. 5F</b> Relative expression levels of ferroptosis-related genes |                   |                                |                      |     |     |
| <i>ptgs2a</i>                                                             | Ctrl              | One-way ANOVA                  | F=10.95; P=0.004 **  |     | N=4 |
|                                                                           | 10 mg/L vs. Ctrl  |                                | P=0.79               | ns  |     |
|                                                                           | 100 mg/L vs. Ctrl |                                | P=0.004              | **  |     |
| <i>ptgs2b</i>                                                             | Ctrl              | Dunnett's multiple comparisons | F=12.26; P<0.004 **  |     | N=4 |
|                                                                           | 10 mg/L vs. Ctrl  |                                | P=0.02               | *   |     |
|                                                                           | 100 mg/L vs. Ctrl |                                | P=0.002              | **  |     |
| <i>nrf2</i>                                                               | Ctrl              | Dunnett's multiple comparisons | F=14.58; P=0.002 **  |     | N=4 |
|                                                                           | 10 mg/L vs. Ctrl  |                                | P=0.001              | **  |     |
|                                                                           | 100 mg/L vs. Ctrl |                                | P=0.05               | *   |     |
| <i>dmt1</i>                                                               | Ctrl              | Dunnett's multiple comparisons | F=12.87; P=0.01 *    |     | N=4 |
|                                                                           | 10 mg/L vs. Ctrl  |                                | P=0.03               | *   |     |
|                                                                           | 100 mg/L vs. Ctrl |                                | P=0.008              | **  |     |
| <i>tf</i>                                                                 | Ctrl              | Dunnett's multiple comparisons | F=74.78; P<0.001 *** |     | N=4 |
|                                                                           | 10 mg/L vs. Ctrl  |                                | P<0.001              | *** |     |
|                                                                           | 100 mg/L vs. Ctrl |                                | P<0.001              | *** |     |
| <i>tfr</i>                                                                | Ctrl              | Dunnett's multiple comparisons | F=4.434; P=4.434 ns  |     | N=4 |
|                                                                           | 10 mg/L vs. Ctrl  |                                | P=0.66               | ns  |     |
|                                                                           | 100 mg/L vs. Ctrl |                                | P=0.05               | *   |     |
| <i>ftth</i>                                                               | Ctrl              | Dunnett's multiple comparisons | F=13.83; P=0.006 **  |     | N=4 |
|                                                                           | 10 mg/L vs. Ctrl  |                                | P=0.005              | **  |     |
|                                                                           | 100 mg/L vs. Ctrl |                                | P=0.009              | **  |     |
| <i>gpx4</i>                                                               | Ctrl              | Dunnett's multiple comparisons | F=596.3; P<0.001 *** |     | N=4 |
|                                                                           | 10 mg/L vs. Ctrl  |                                | P<0.001              | *** |     |
|                                                                           | 100 mg/L vs. Ctrl |                                | P<0.001              | *** |     |
| <i>scl7a11</i>                                                            | Ctrl              | Dunnett's multiple comparisons | F=8.986; P=0.01 *    |     | N=4 |

|                                                                      |                   |                                |                      |     |      |
|----------------------------------------------------------------------|-------------------|--------------------------------|----------------------|-----|------|
|                                                                      | 10 mg/L vs. Ctrl  |                                | P=0.02               | *   |      |
|                                                                      | 100 mg/L vs. Ctrl |                                | P=0.01               | *   |      |
| <i>ho-1</i>                                                          | Ctrl              |                                | F=23.10; P<0.001 *** |     | N=4  |
|                                                                      | 10 mg/L vs. Ctrl  |                                | P=0.41               | ns  |      |
|                                                                      | 100 mg/L vs. Ctrl |                                | P=0.003              | **  |      |
| □                                                                    |                   |                                |                      |     |      |
| <b>Figure. 5H</b> Relative number of mitochondria in the brain (%)   |                   |                                |                      |     |      |
| Ctrl                                                                 |                   | One-way ANOVA                  | F=26.44; P<0.001 *** |     | N=6  |
| 10 mg/L vs. Ctrl                                                     |                   | Dunnett's multiple comparisons | P<0.001              | *** | N=6  |
| 100 mg/L vs. Ctrl                                                    |                   |                                | P<0.001              | *** | N=7  |
| □                                                                    |                   |                                |                      |     |      |
| <b>Figure. 5I</b> Relative area of mitochondria in the brain (%)     |                   |                                |                      |     |      |
| Ctrl                                                                 |                   | Kruskal-Wallis                 | F=8.265; P<0.001 *** |     | N=77 |
| 10 mg/L vs. Ctrl                                                     |                   | Dunn's multiple comparisons    | P<0.001              | *** | N=66 |
| 100 mg/L vs. Ctrl                                                    |                   |                                | P<0.001              | *** | N=85 |
| □                                                                    |                   |                                |                      |     |      |
| <b>Figure. 5J</b> Relative diameter of mitochondria in the brain (%) |                   |                                |                      |     |      |
| Ctrl                                                                 |                   | Kruskal-Wallis                 | H=124.4; P<0.001 *** |     | N=77 |
| 10 mg/L vs. Ctrl                                                     |                   | Dunn's multiple comparisons    | P<0.001              | *** | N=66 |
| 100 mg/L vs. Ctrl                                                    |                   |                                | P<0.001              | *** | N=85 |
| □                                                                    |                   |                                |                      |     |      |
| <b>Figure. 6B</b> Relative fluorescence of DFC                       |                   |                                |                      |     |      |
| Ctrl                                                                 |                   | Unpaired t-test                |                      |     | N=6  |
| Ctrl vs. NAC                                                         |                   |                                | P=0.2419             | ns  | N=6  |
| Ctrl vs. NiO-NPs (10mg/L)                                            |                   |                                | P=0.0023             | **  | N=6  |
| NiO-NPs (10mg/L) vs.<br>NiO-NPs (10mg/L) + DFO                       |                   |                                | P<0.0001             | *** | N=6  |
| Ctrl vs. NiO-NPs (100mg/L)                                           |                   |                                | P=0.0271             | *   | N=6  |
| NiO-NPs (100mg/L) vs.                                                |                   |                                | P=0.0458             | *   | N=6  |

|                                                                         |                                                 |                                |                      |      |     |
|-------------------------------------------------------------------------|-------------------------------------------------|--------------------------------|----------------------|------|-----|
| NiO-NPs (100mg/L) + DFO                                                 |                                                 |                                |                      |      |     |
| □                                                                       |                                                 |                                |                      |      |     |
| <b>Figure. 6D</b> Relative density of apoptotic cells                   |                                                 |                                |                      |      |     |
| Ctrl                                                                    | Unpaired t-test                                 |                                |                      | N=13 |     |
| Ctrl vs. NAC                                                            |                                                 | P=0.3038                       | ns                   | N=6  |     |
| Ctrl vs. NiO-NPs (10mg/L)                                               |                                                 | P<0.0001                       | ***                  | N=8  |     |
| NiO-NPs (10mg/L) vs.<br>NiO-NPs (10mg/L) + DFO                          |                                                 | P<0.0001                       | ***                  | N=6  |     |
| Ctrl vs. NiO-NPs (100mg/L)                                              |                                                 | P<0.0001                       | ***                  | N=8  |     |
| NiO-NPs (100mg/L) vs.<br>NiO-NPs (100mg/L) + DFO                        |                                                 | P<0.0001                       | ***                  | N=7  |     |
| □                                                                       |                                                 |                                |                      |      |     |
| <b>Figure. 6E</b> Relative expression levels of apoptosis-related genes |                                                 |                                |                      |      |     |
| <i>bax</i>                                                              | Ctrl                                            | Dunnett's multiple comparisons | F=141.1; P<0.001 *** |      | N=3 |
|                                                                         | NiO-NPs (10 mg/L) vs. Ctrl                      |                                | P<0.001              | ***  |     |
|                                                                         | NiO-NPs (10 mg/L) vs.<br>NiO-NPs (10 mg/L) +NAC |                                | P<0.001              | ***  |     |
| <i>bcl</i>                                                              | Ctrl                                            |                                | F=46.57; P<0.001 *** |      | N=3 |
|                                                                         | NiO-NPs (10 mg/L) vs. Ctrl                      |                                | P<0.001              | ***  |     |
|                                                                         | NiO-NPs (10 mg/L) vs.<br>NiO-NPs (10 mg/L) +NAC |                                | P<0.001              | ***  |     |
| <i>caspase3b</i>                                                        | Ctrl                                            | F=167.9; P<0.001 ***           |                      | N=3  |     |
|                                                                         | NiO-NPs (10 mg/L) vs. Ctrl                      | P=0.009                        | **                   |      |     |
|                                                                         | NiO-NPs (10 mg/L) vs.<br>NiO-NPs (10 mg/L) +NAC | P<0.001                        | ***                  |      |     |
| <i>caspase8</i>                                                         | Ctrl                                            | F=10.70; P=0.01 *              |                      | N=3  |     |
|                                                                         | NiO-NPs (10 mg/L) vs. Ctrl                      | P=0.01                         | *                    |      |     |
|                                                                         | NiO-NPs (10 mg/L) vs.<br>NiO-NPs (10 mg/L) +NAC | P=0.02                         | *                    |      |     |

|                                                                   |                                |                      |                      |      |     |
|-------------------------------------------------------------------|--------------------------------|----------------------|----------------------|------|-----|
| <i>caspase9</i>                                                   | Ctrl                           |                      | F=40.10; P<0.001 *** |      | N=3 |
|                                                                   | NiO-NPs (10 mg/L) vs. Ctrl     |                      | P<0.001              | ***  |     |
|                                                                   | NiO-NPs (10 mg/L) vs.          |                      | P=0.002              | **   |     |
|                                                                   | NiO-NPs (10 mg/L) +NAC         |                      |                      |      |     |
| □                                                                 |                                |                      |                      |      |     |
| <b>Figure. 6G</b> Relative density of periventricular neurons (%) |                                |                      |                      |      |     |
| Ctrl                                                              | One-way ANOVA                  | F=20.90; P<0.001 *** | N=15                 |      |     |
| Ctrl vs. NAC                                                      | Dunnett's multiple comparisons | P=0.9220             | ns                   | N=9  |     |
| Ctrl vs. NiO-NPs (10mg/L)                                         |                                | P<0.0001             | ***                  | N=12 |     |
| NiO-NPs (10mg/L) vs. NiO-NPs (10mg/L) + NAC                       |                                | P<0.0001             | ***                  | N=10 |     |
| Ctrl vs. NiO-NPs (100mg/L)                                        |                                | P<0.0001             | ***                  | N=10 |     |
| NiO-NPs (100mg/L) vs. NiO-NPs (100mg/L) + NAC                     |                                | P=0.0159             | *                    | N=8  |     |
| □                                                                 |                                |                      |                      |      |     |
| <b>Figure. 6J</b> Distance moved by larvae under locomotion test  |                                |                      |                      |      |     |
| Ctrl                                                              | Kruskal-Wallis                 | H=54.18; P<0.001 *** | N=32                 |      |     |
| Ctrl vs. NAC                                                      | Dunn's multiple comparisons    | P>0.99               | ns                   | N=32 |     |
| Ctrl vs. NiO-NPs (10mg/L)                                         |                                | P=0.05               | *                    | N=32 |     |
| NiO-NPs (10mg/L) vs. NiO-NPs (10mg/L) + NAC                       |                                | P>0.99               | ns                   | N=32 |     |
| Ctrl vs. NiO-NPs (100mg/L)                                        |                                | P<0.001              | ***                  | N=32 |     |
| NiO-NPs (100mg/L) vs. NiO-NPs (100mg/L) + NAC                     |                                | P=0.05               | *                    | N=32 |     |
| □                                                                 |                                |                      |                      |      |     |
| <b>Figure. 6K</b> Velocity of larvae under locomotion test        |                                |                      |                      |      |     |
| Ctrl                                                              | Kruskal-Wallis                 | H=54.18; P<0.001 *** | N=32                 |      |     |
| Ctrl vs. NAC                                                      | Dunn's multiple comparisons    | P>0.99               | ns                   | N=32 |     |
| Ctrl vs. NiO-NPs (10mg/L)                                         |                                | P=0.05               | *                    | N=32 |     |

|                                                  |  |         |     |      |
|--------------------------------------------------|--|---------|-----|------|
| NiO-NPs (10mg/L) vs.<br>NiO-NPs (10mg/L) + NAC   |  | P>0.99  | ns  | N=32 |
| Ctrl vs. NiO-NPs (100mg/L)                       |  | P<0.001 | *** | N=32 |
| NiO-NPs (100mg/L) vs.<br>NiO-NPs (100mg/L) + NAC |  | P=0.05  | *   | N=32 |

□

**Figure. 6L** Cumulative mobility of larvae under locomotion test

|                                                  |                                |                      |     |      |
|--------------------------------------------------|--------------------------------|----------------------|-----|------|
| Ctrl                                             | Kruskal-Wallis                 | H=56.15; P<0.001 *** |     | N=32 |
| Ctrl vs. NAC                                     | Dunn's multiple<br>comparisons | P>0.99               | ns  | N=32 |
| Ctrl vs. NiO-NPs (10mg/L)                        |                                | P=0.05               | *   | N=32 |
| NiO-NPs (10mg/L) vs.<br>NiO-NPs (10mg/L) + NAC   |                                | P>0.99               | ns  | N=32 |
| Ctrl vs. NiO-NPs (100mg/L)                       |                                | P<0.001              | *** | N=32 |
| NiO-NPs (100mg/L) vs.<br>NiO-NPs (100mg/L) + NAC |                                | P=0.05               | *   | N=32 |

□

**Figure. 6M** Maximum acceleration of larvae under locomotion test

|                                                  |                                |                      |    |      |
|--------------------------------------------------|--------------------------------|----------------------|----|------|
| Ctrl                                             | Kruskal-Wallis                 | F=22.05; P<0.001 *** |    | N=32 |
| Ctrl vs. NAC                                     | Dunn's multiple<br>comparisons | P>0.99               | ns | N=32 |
| Ctrl vs. NiO-NPs (10mg/L)                        |                                | P=0.89               | ns | N=32 |
| NiO-NPs (10mg/L) vs.<br>NiO-NPs (10mg/L) + NAC   |                                | P>0.99               | ns | N=32 |
| Ctrl vs. NiO-NPs (100mg/L)                       |                                | P=0.001              | ** | N=32 |
| NiO-NPs (100mg/L) vs.<br>NiO-NPs (100mg/L) + NAC |                                | P=0.002              | ** | N=32 |

□

**Figure. 6P** Distance moved of larvae during whole tapping stimulation test

|              |                 |                      |    |      |
|--------------|-----------------|----------------------|----|------|
| Ctrl         | Kruskal-Wallis  | F=45.69; P<0.001 *** |    | N=32 |
| Ctrl vs. NAC | Dunn's multiple | P>0.99               | ns | N=32 |



|                                                  |             |         |     |      |
|--------------------------------------------------|-------------|---------|-----|------|
| Ctrl vs. NiO-NPs (10mg/L)                        | comparisons | P=0.05  | *   | N=32 |
| NiO-NPs (10mg/L) vs.<br>NiO-NPs (10mg/L) + NAC   |             | P>0.99  | ns  | N=32 |
| Ctrl vs. NiO-NPs (100mg/L)                       |             | P<0.001 | *** | N=32 |
| NiO-NPs (100mg/L) vs.<br>NiO-NPs (100mg/L) + NAC |             | P=0.03  | *   | N=32 |

□

**Figure. 6Q** Velocity of larvae during whole tapping stimulation test

|                                                  |                                |                      |     |      |
|--------------------------------------------------|--------------------------------|----------------------|-----|------|
| Ctrl                                             | Kruskal-Wallis                 | F=45.69; P<0.001 *** |     | N=32 |
| Ctrl vs. NAC                                     | Dunn's multiple<br>comparisons | P>0.99               | ns  | N=32 |
| Ctrl vs. NiO-NPs (10mg/L)                        |                                | P=0.05               | *   | N=32 |
| NiO-NPs (10mg/L) vs.<br>NiO-NPs (10mg/L) + NAC   |                                | P>0.99               | ns  | N=32 |
| Ctrl vs. NiO-NPs (100mg/L)                       |                                | P<0.001              | *** | N=32 |
| NiO-NPs (100mg/L) vs.<br>NiO-NPs (100mg/L) + NAC |                                | P=0.03               | *   | N=32 |

□

**Figure. 6R** Cumulative mobility of larvae during whole tapping stimulation test

|                                                  |                                |                      |     |      |
|--------------------------------------------------|--------------------------------|----------------------|-----|------|
| Ctrl                                             | Kruskal-Wallis                 | H=51.91; P<0.001 *** |     | N=32 |
| Ctrl vs. NAC                                     | Dunn's multiple<br>comparisons | P>0.99               | ns  | N=32 |
| Ctrl vs. NiO-NPs (10mg/L)                        |                                | P=0.03               | *   | N=32 |
| NiO-NPs (10mg/L) vs.<br>NiO-NPs (10mg/L) + NAC   |                                | P>0.99               | ns  | N=32 |
| Ctrl vs. NiO-NPs (100mg/L)                       |                                | P<0.001              | *** | N=32 |
| NiO-NPs (100mg/L) vs.<br>NiO-NPs (100mg/L) + NAC |                                | P=0.02               | *   | N=32 |

□

**Figure. 6S** Maximum acceleration of larvae during whole tapping stimulation test

|      |               |                   |      |
|------|---------------|-------------------|------|
| Ctrl | One-way ANOVA | F=2.521; P=0.03 * | N=32 |
|------|---------------|-------------------|------|

|                                                  |                                |        |    |      |
|--------------------------------------------------|--------------------------------|--------|----|------|
| Ctrl vs. NAC                                     | Dunnett's multiple comparisons | P=0.98 | ns | N=32 |
| Ctrl vs. NiO-NPs (10mg/L)                        |                                | P=0.29 | ns | N=32 |
| NiO-NPs (10mg/L) vs.<br>NiO-NPs (10mg/L) + NAC   |                                | P=0.98 | ns | N=32 |
| Ctrl vs. NiO-NPs (100mg/L)                       |                                | P=0.21 | ns | N=32 |
| NiO-NPs (100mg/L) vs.<br>NiO-NPs (100mg/L) + NAC |                                | P=0.87 | ns | N=32 |

□

**Figure. 6T** Distance moved of larvae within 1s immediately after the vibrations

|                                                  |                                |                      |     |      |
|--------------------------------------------------|--------------------------------|----------------------|-----|------|
| Ctrl                                             | One-way ANOVA                  | F=16.44; P<0.001 *** |     | N=32 |
| Ctrl vs. NAC                                     | Dunnett's multiple comparisons | P>0.99               | ns  | N=32 |
| Ctrl vs. NiO-NPs (10mg/L)                        |                                | P=0.98               | ns  | N=32 |
| NiO-NPs (10mg/L) vs.<br>NiO-NPs (10mg/L) + NAC   |                                | P=0.91               | ns  | N=32 |
| Ctrl vs. NiO-NPs (100mg/L)                       |                                | P<0.001              | *** | N=32 |
| NiO-NPs (100mg/L) vs.<br>NiO-NPs (100mg/L) + NAC |                                | P=0.75               | ns  | N=32 |

□

**Figure. 6U** Velocity of larvae within 1s immediately after the vibrations

|                                                  |                                |                      |     |      |
|--------------------------------------------------|--------------------------------|----------------------|-----|------|
| Ctrl                                             | One-way ANOVA                  | F=16.44; P<0.001 *** |     | N=32 |
| Ctrl vs. NAC                                     | Dunnett's multiple comparisons | P>0.99               | ns  | N=32 |
| Ctrl vs. NiO-NPs (10mg/L)                        |                                | P=0.98               | ns  | N=32 |
| NiO-NPs (10mg/L) vs.<br>NiO-NPs (10mg/L) + NAC   |                                | P=0.91               | ns  | N=32 |
| Ctrl vs. NiO-NPs (100mg/L)                       |                                | P<0.001              | *** | N=32 |
| NiO-NPs (100mg/L) vs.<br>NiO-NPs (100mg/L) + NAC |                                | P=0.75               | ns  | N=32 |

□

**Figure. 6V** Cumulative mobility of larvae within 1s immediately after the vibrations

|                                               |                                |                      |     |      |
|-----------------------------------------------|--------------------------------|----------------------|-----|------|
| Ctrl                                          | One-way ANOVA                  | F=74.97; P<0.001 *** |     | N=16 |
| Ctrl vs. NAC                                  | Dunnett's multiple comparisons | P=0.42               | ns  | N=16 |
| Ctrl vs. NiO-NPs (10mg/L)                     |                                | P=0.40               | ns  | N=16 |
| NiO-NPs (10mg/L) vs. NiO-NPs (10mg/L) + NAC   |                                | P=0.87               | ns  | N=16 |
| Ctrl vs. NiO-NPs (100mg/L)                    |                                | P<0.001              | *** | N=16 |
| NiO-NPs (100mg/L) vs. NiO-NPs (100mg/L) + NAC |                                | P=0.11               | ns  | N=16 |

□

**Figure. 6W** Maximum acceleration of larvae within 1s immediately after the vibrations

|                                               |                                |                   |     |      |
|-----------------------------------------------|--------------------------------|-------------------|-----|------|
| Ctrl                                          | One-way ANOVA                  | F=56.56; P=0.03 * |     | N=32 |
| Ctrl vs. NAC                                  | Dunnett's multiple comparisons | P=0.28            | ns  | N=32 |
| Ctrl vs. NiO-NPs (10mg/L)                     |                                | P=0.77            | ns  | N=32 |
| NiO-NPs (10mg/L) vs. NiO-NPs (10mg/L) + NAC   |                                | P=0.92            | ns  | N=32 |
| Ctrl vs. NiO-NPs (100mg/L)                    |                                | P<0.001           | *** | N=32 |
| NiO-NPs (100mg/L) vs. NiO-NPs (100mg/L) + NAC |                                | P=0.56            | ns  | N=32 |

□

**Figure. 7A** Relative expression levels of apoptosis-related genes

|                |                                                |                 |          |     |     |
|----------------|------------------------------------------------|-----------------|----------|-----|-----|
| <i>gpx4</i>    | Ctrl                                           | Unpaired t-test |          |     | N=3 |
|                | NiO-NPs (10 mg/L) vs. Ctrl                     |                 | P=0.0033 | **  |     |
|                | NiO-NPs (10 mg/L) vs. NiO-NPs (10 mg/L) +DFO   |                 | P=0.0027 | **  |     |
| <i>slc7a11</i> | Ctrl                                           |                 |          |     | N=3 |
|                | NiO-NPs (100 mg/L) vs. Ctrl                    |                 | P=0.0042 | **  |     |
|                | NiO-NPs (100 mg/L) vs. NiO-NPs (100 mg/L) +DFO |                 | P<0.001  | *** |     |
| <i>nrf2</i>    | Ctrl                                           |                 |          | N=3 |     |

|             |                                                |  |          |     |     |
|-------------|------------------------------------------------|--|----------|-----|-----|
|             | NiO-NPs (100 mg/L) vs. Ctrl                    |  | P=0.0403 | *   |     |
|             | NiO-NPs (100 mg/L) vs. NiO-NPs (100 mg/L) +DFO |  | P=0.0492 | *   |     |
| <i>ho-1</i> | Ctrl                                           |  |          |     | N=3 |
|             | NiO-NPs (100 mg/L) vs. Ctrl                    |  | P<0.001  | *** |     |
|             | NiO-NPs (100 mg/L) vs. NiO-NPs (100 mg/L) +DFO |  | P=0.0077 | **  |     |
| <i>dmt1</i> | Ctrl                                           |  |          |     | N=3 |
|             | NiO-NPs (100 mg/L) vs. Ctrl                    |  | P=0.0044 | **  |     |
|             | NiO-NPs (100 mg/L) vs. NiO-NPs (100 mg/L) +DFO |  | P=0.0235 | *   |     |
| <i>fth</i>  | Ctrl                                           |  |          |     | N=3 |
|             | NiO-NPs (100 mg/L) vs. Ctrl                    |  | P=0.0011 | **  |     |
|             | NiO-NPs (100 mg/L) vs. NiO-NPs (100 mg/L) +DFO |  | P=0.0088 | **  |     |
| <i>tfr</i>  | Ctrl                                           |  |          |     | N=3 |
|             | NiO-NPs (100 mg/L) vs. Ctrl                    |  | P=0.0138 | *   |     |
|             | NiO-NPs (100 mg/L) vs. NiO-NPs (100 mg/L) +DFO |  | P=0.0200 | *   |     |
| <i>tf</i>   | Ctrl                                           |  |          |     | N=3 |
|             | NiO-NPs (100 mg/L) vs. Ctrl                    |  | P=0.0368 | *   |     |
|             | NiO-NPs (100 mg/L) vs. NiO-NPs (100 mg/L) +DFO |  | P=0.0497 | *   |     |

□

**Figure. 7** Relative density of periventricular neurons (%)

|                           |                                |                   |      |
|---------------------------|--------------------------------|-------------------|------|
| Ctrl                      | One-way ANOVA                  | F=9.622; P=0.03 * | N=31 |
| Ctrl vs. NAC              | Dunnett's multiple comparisons | P=0.85            | ns   |
| Ctrl vs. NiO-NPs (10mg/L) |                                | P=0.02            | *    |
| NiO-NPs (10mg/L) vs.      |                                | P>0.99            | ns   |

|                                                  |  |          |     |      |
|--------------------------------------------------|--|----------|-----|------|
| NiO-NPs (10mg/L) + NAC                           |  |          |     |      |
| Ctrl vs. NiO-NPs (100mg/L)                       |  | P<0.001  | *** | N=18 |
| NiO-NPs (100mg/L) vs.<br>NiO-NPs (100mg/L) + NAC |  | P=0.0284 | *   | N=20 |

□

**Figure. 7F** Distance moved by larvae under locomotion test

|                                                  |                                |                      |     |      |
|--------------------------------------------------|--------------------------------|----------------------|-----|------|
| Ctrl                                             | One-way ANOVA                  | F=17.11; P<0.001 *** |     | N=24 |
| Ctrl vs. NAC                                     | Dunnett's multiple comparisons | P=0.83               | ns  | N=24 |
| Ctrl vs. NiO-NPs (10mg/L)                        |                                | P=0.006              | **  | N=24 |
| NiO-NPs (10mg/L) vs.<br>NiO-NPs (10mg/L) + NAC   |                                | P=0.83               | ns  | N=24 |
| Ctrl vs. NiO-NPs (100mg/L)                       |                                | P<0.001              | *** | N=24 |
| NiO-NPs (100mg/L) vs.<br>NiO-NPs (100mg/L) + NAC |                                | P=0.03               | *   | N=24 |

□

**Figure. 7G** Velocity of larvae under locomotion test

|                                                  |                                |                      |     |      |
|--------------------------------------------------|--------------------------------|----------------------|-----|------|
| Ctrl                                             | One-way ANOVA                  | F=17.11; P<0.001 *** |     | N=24 |
| Ctrl vs. NAC                                     | Dunnett's multiple comparisons | P=0.83               | ns  | N=24 |
| Ctrl vs. NiO-NPs (10mg/L)                        |                                | P=0.006              | **  | N=24 |
| NiO-NPs (10mg/L) vs.<br>NiO-NPs (10mg/L) + NAC   |                                | P=0.83               | ns  | N=24 |
| Ctrl vs. NiO-NPs (100mg/L)                       |                                | P<0.001              | *** | N=24 |
| NiO-NPs (100mg/L) vs.<br>NiO-NPs (100mg/L) + NAC |                                | P=0.03               | *   | N=24 |

□

**Figure. 7H** Cumulative mobility of larvae under locomotion test

|                           |                                |                      |    |      |
|---------------------------|--------------------------------|----------------------|----|------|
| Ctrl                      | One-way ANOVA                  | F=16.79; P<0.001 *** |    | N=24 |
| Ctrl vs. NAC              | Dunnett's multiple comparisons | P=0.73               | ns | N=24 |
| Ctrl vs. NiO-NPs (10mg/L) |                                | P=0.02               | *  | N=24 |

|                                                  |             |         |     |      |
|--------------------------------------------------|-------------|---------|-----|------|
| NiO-NPs (10mg/L) vs.<br>NiO-NPs (10mg/L) + NAC   | comparisons | P=0.23  | ns  | N=24 |
| Ctrl vs. NiO-NPs (100mg/L)                       |             | P<0.001 | *** | N=24 |
| NiO-NPs (100mg/L) vs.<br>NiO-NPs (100mg/L) + NAC |             | P=0.04  | *   | N=24 |

□

**Figure. 7I** Maximum acceleration of larvae under locomotion test

|                                                  |                                   |                   |    |      |
|--------------------------------------------------|-----------------------------------|-------------------|----|------|
| Ctrl                                             | One-way ANOVA                     | F=2.799; P=0.02 * |    | N=24 |
| Ctrl vs. NAC                                     | Dunnett's multiple<br>comparisons | P=0.85            | ns | N=24 |
| Ctrl vs. NiO-NPs (10mg/L)                        |                                   | P=0.62            | ns | N=24 |
| NiO-NPs (10mg/L) vs.<br>NiO-NPs (10mg/L) + NAC   |                                   | P>0.99            | ns | N=24 |
| Ctrl vs. NiO-NPs (100mg/L)                       |                                   | P=0.02            | *  | N=24 |
| NiO-NPs (100mg/L) vs.<br>NiO-NPs (100mg/L) + NAC |                                   | P=0.05            | *  | N=24 |

□

**Figure. 7L** Distance moved of larvae during whole tapping stimulation test

|                                                  |                                   |                      |     |      |
|--------------------------------------------------|-----------------------------------|----------------------|-----|------|
| Ctrl                                             | One-way ANOVA                     | F=10.66; P<0.001 *** |     | N=24 |
| Ctrl vs. NAC                                     | Dunnett's multiple<br>comparisons | P>0.99               | ns  | N=24 |
| Ctrl vs. NiO-NPs (10mg/L)                        |                                   | P=0.01               | *   | N=24 |
| NiO-NPs (10mg/L) vs.<br>NiO-NPs (10mg/L) + NAC   |                                   | P>0.62               | ns  | N=24 |
| Ctrl vs. NiO-NPs (100mg/L)                       |                                   | P<0.001              | *** | N=24 |
| NiO-NPs (100mg/L) vs.<br>NiO-NPs (100mg/L) + NAC |                                   | P=0.05               | *   | N=24 |

□

**Figure. 7M** Velocity of larvae during whole tapping stimulation test

|              |                    |                      |    |      |
|--------------|--------------------|----------------------|----|------|
| Ctrl         | One-way ANOVA      | L=10.66; P<0.001 *** |    | N=24 |
| Ctrl vs. NAC | Dunnett's multiple | P>0.99               | ns | N=24 |

|                                                  |             |         |     |      |
|--------------------------------------------------|-------------|---------|-----|------|
| Ctrl vs. NiO-NPs (10mg/L)                        | comparisons | P=0.01  | *   | N=24 |
| NiO-NPs (10mg/L) vs.<br>NiO-NPs (10mg/L) + NAC   |             | P>0.62  | ns  | N=24 |
| Ctrl vs. NiO-NPs (100mg/L)                       |             | P<0.001 | *** | N=24 |
| NiO-NPs (100mg/L) vs.<br>NiO-NPs (100mg/L) + NAC |             | P=0.05  | *   | N=24 |

□

**Figure. 7N** Cumulative mobility of larvae during whole tapping stimulation test

|                                                  |                                   |                      |      |      |
|--------------------------------------------------|-----------------------------------|----------------------|------|------|
| Ctrl                                             | One-way ANOVA                     | F=14.20; P<0.001 *** | N=24 |      |
| Ctrl vs. NAC                                     | Dunnett's multiple<br>comparisons | P>0.99               | ns   | N=24 |
| Ctrl vs. NiO-NPs (10mg/L)                        |                                   | P=0.04               | *    | N=24 |
| NiO-NPs (10mg/L) vs.<br>NiO-NPs (10mg/L) + NAC   |                                   | P=0.30               | ns   | N=24 |
| Ctrl vs. NiO-NPs (100mg/L)                       |                                   | P<0.001              | ***  | N=24 |
| NiO-NPs (100mg/L) vs.<br>NiO-NPs (100mg/L) + NAC |                                   | P=0.03               | *    | N=24 |

□

**Figure. 7O** Maximum acceleration of larvae during whole tapping stimulation test

|                                                  |                                   |                      |      |      |
|--------------------------------------------------|-----------------------------------|----------------------|------|------|
| Ctrl                                             | One-way ANOVA                     | F=4.597; P<0.001 *** | N=24 |      |
| Ctrl vs. NAC                                     | Dunnett's multiple<br>comparisons | P>0.99               | ns   | N=24 |
| Ctrl vs. NiO-NPs (10mg/L)                        |                                   | P=0.25               | ns   | N=24 |
| NiO-NPs (10mg/L) vs.<br>NiO-NPs (10mg/L) + NAC   |                                   | P=0.96               | ns   | N=24 |
| Ctrl vs. NiO-NPs (100mg/L)                       |                                   | P=0.005              | **   | N=24 |
| NiO-NPs (100mg/L) vs.<br>NiO-NPs (100mg/L) + NAC |                                   | P=0.02               | *    | N=24 |

□

**Figure. 7P** Distance moved of larvae within 1s immediately after the vibrations

|      |               |                      |      |
|------|---------------|----------------------|------|
| Ctrl | One-way ANOVA | F=24.48; P<0.001 *** | N=24 |
|------|---------------|----------------------|------|

|                                                  |                                |         |     |      |
|--------------------------------------------------|--------------------------------|---------|-----|------|
| Ctrl vs. NAC                                     | Dunnett's multiple comparisons | P=0.06  | ns  | N=24 |
| Ctrl vs. NiO-NPs (10mg/L)                        |                                | P=0.05  | ns  | N=24 |
| NiO-NPs (10mg/L) vs.<br>NiO-NPs (10mg/L) + NAC   |                                | P=0.71  | ns  | N=24 |
| Ctrl vs. NiO-NPs (100mg/L)                       |                                | P<0.001 | *** | N=24 |
| NiO-NPs (100mg/L) vs.<br>NiO-NPs (100mg/L) + NAC |                                | P<0.001 | *** | N=24 |

□

**Figure. 7Q** Velocity of larvae within 1s immediately after the vibrations

|                                                  |                                |                      |     |      |
|--------------------------------------------------|--------------------------------|----------------------|-----|------|
| Ctrl                                             | One-way ANOVA                  | F=24.48; P<0.001 *** |     | N=24 |
| Ctrl vs. NAC                                     | Dunnett's multiple comparisons | P=0.06               | ns  | N=24 |
| Ctrl vs. NiO-NPs (10mg/L)                        |                                | P=0.05               | ns  | N=24 |
| NiO-NPs (10mg/L) vs.<br>NiO-NPs (10mg/L) + NAC   |                                | P=0.71               | ns  | N=24 |
| Ctrl vs. NiO-NPs (100mg/L)                       |                                | P<0.001              | *** | N=24 |
| NiO-NPs (100mg/L) vs.<br>NiO-NPs (100mg/L) + NAC |                                | P<0.001              | *** | N=24 |

□

**Figure. 7R** Cumulative mobility of larvae within 1s immediately after the vibrations

|                                                  |                                |                      |     |      |
|--------------------------------------------------|--------------------------------|----------------------|-----|------|
| Ctrl                                             | One-way ANOVA                  | F=49.48; P<0.001 *** |     | N=24 |
| Ctrl vs. NAC                                     | Dunnett's multiple comparisons | P=0.06               | ns  | N=24 |
| Ctrl vs. NiO-NPs (10mg/L)                        |                                | P=0.19               | ns  | N=24 |
| NiO-NPs (10mg/L) vs.<br>NiO-NPs (10mg/L) + NAC   |                                | P=0.08               | ns  | N=24 |
| Ctrl vs. NiO-NPs (100mg/L)                       |                                | P<0.001              | *** | N=24 |
| NiO-NPs (100mg/L) vs.<br>NiO-NPs (100mg/L) + NAC |                                | P<0.001              | *** | N=24 |

□

**Figure. 7S** Maximum acceleration of larvae within 1s immediately after the vibrations



|                                                  |                                |                      |     |      |
|--------------------------------------------------|--------------------------------|----------------------|-----|------|
| Ctrl                                             | One-way ANOVA                  | F=11.36; P<0.001 *** |     | N=24 |
| Ctrl vs. NAC                                     | Dunnett's multiple comparisons | P=0.06               | ns  | N=24 |
| Ctrl vs. NiO-NPs (10mg/L)                        |                                | P=0.02               | *   | N=24 |
| NiO-NPs (10mg/L) vs.<br>NiO-NPs (10mg/L) + NAC   |                                | P=>0.99              | ns  | N=24 |
| Ctrl vs. NiO-NPs (100mg/L)                       |                                | P<0.001              | *** | N=24 |
| NiO-NPs (100mg/L) vs.<br>NiO-NPs (100mg/L) + NAC |                                | P<0.001              | *** | N=24 |

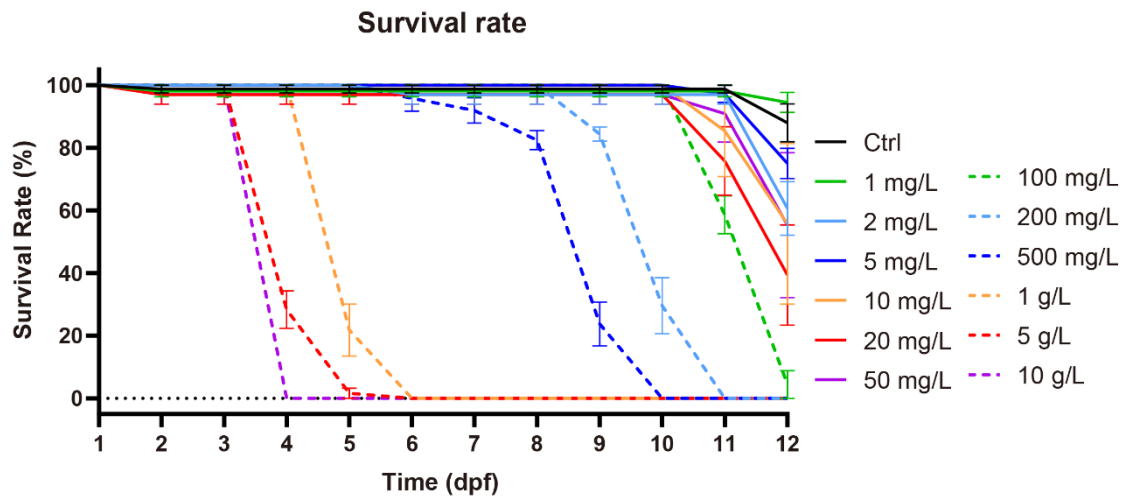

**Figure S1. Survival rate of zebrafish embryos/larvae exposed to NiO-NPs from 1 to 12 dpf.**

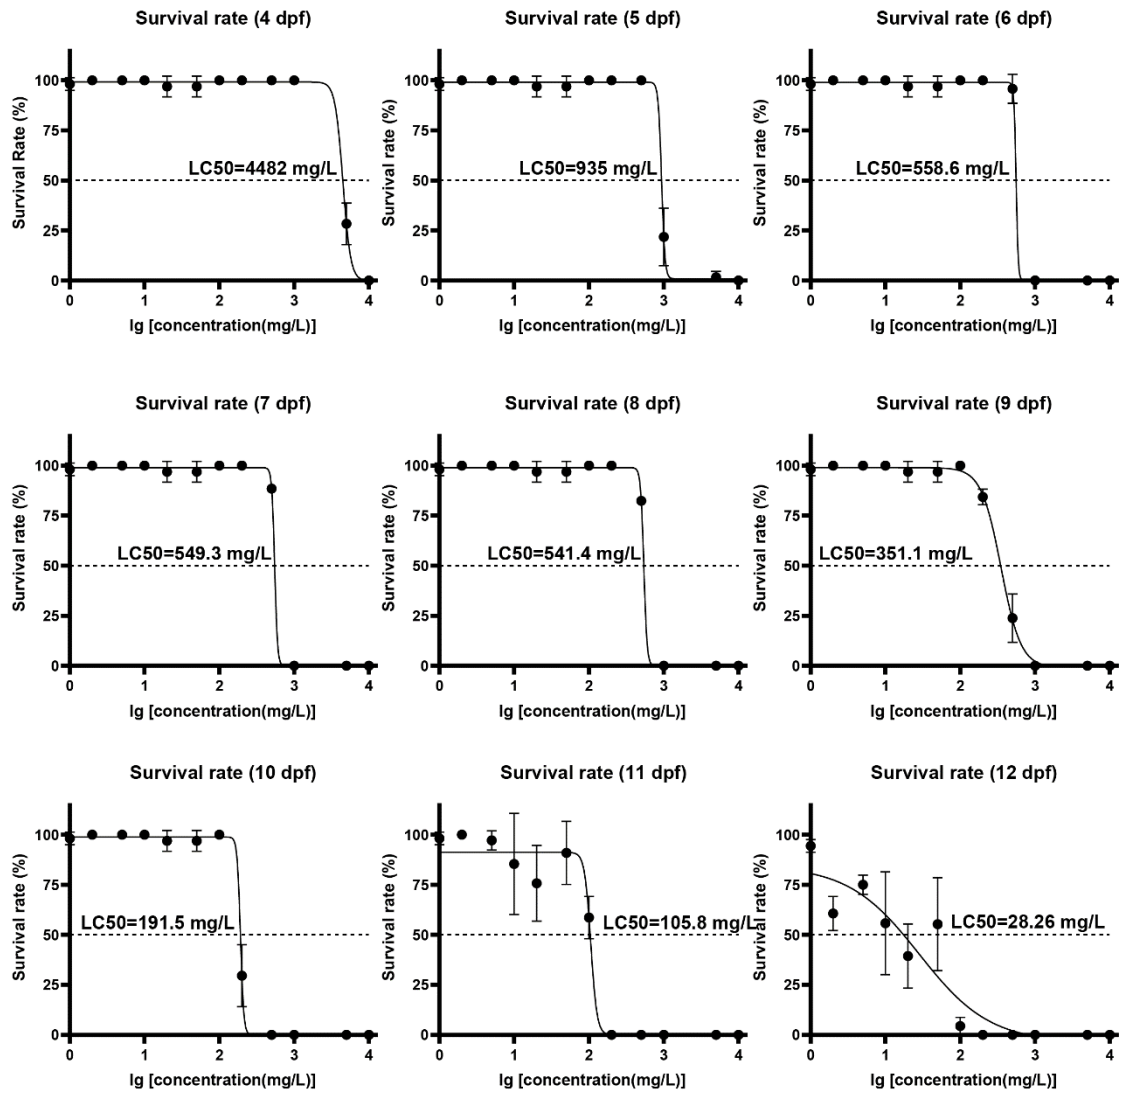

Figure S2. The median lethal concentration (LC50) of NiO-NPs to zebrafish larvae.
